# Supplementary material for: Association between Secondhand Smoke Exposure and Hypertension in 106,268 Korean Self-Reported Never-Smokers Verified by Cotinine
Source: J Clin Med. 2019 Aug 16;8(8):1238. doi: 10.3390/jcm8081238 (PMC6723357; doi:10.3390/jcm8081238)
Supplement: Supplementary file 1 [file jcm-08-01238-s001.pdf]

## Supplementary Materials

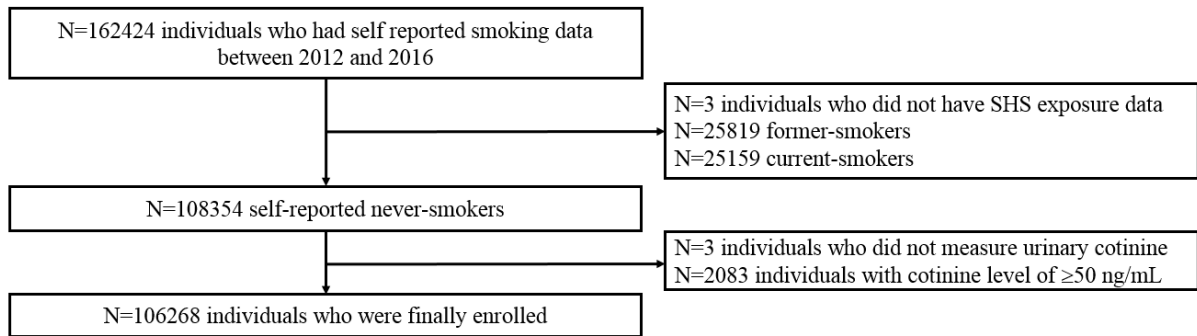

**Figure S1.** Flow chart for sample selection criteria. SHS, secondhand smoke.

**Table S1.** Characteristics of never-smokers with and without hypertension.

|                                           | Hypertension (-)<br><i>n</i> = 100,322 | Hypertension (+)<br><i>n</i> = 5,755 | <i>p</i> value |
|-------------------------------------------|----------------------------------------|--------------------------------------|----------------|
| Age, years                                | 34.0 ± 6.6                             | 41.1 ± 11.8                          | <0.001         |
| Sex (males), <i>n</i> (%)                 | 29,127/100,322 (29.0)                  | 3424/5755 (59.5)                     | <0.001         |
| Body mass index, kg/m <sup>2</sup>        | 22.2 ± 3.2                             | 25.6 ± 4.0                           | <0.001         |
| Waist circumference, cm                   | 77.6 ± 9.2                             | 87.1 ± 10.4                          | <0.001         |
| Systolic blood pressure, mmHg             | 103.1 ± 10.7                           | 125.5 ± 15.0                         | <0.001         |
| Diastolic blood pressure, mmHg            | 65.7 ± 8.0                             | 81.9 ± 12.0                          | <0.001         |
| Serum creatinine, umol/L                  | 67.7 ± 15.3                            | 77.9 ± 27.1                          | <0.001         |
| Uric acid, umol/L                         | 287.1 ± 79.7                           | 343.0 ± 91.3                         | <0.001         |
| Total cholesterol, mmol/L                 | 4.82 ± 0.83                            | 5.14 ± 0.94                          | <0.001         |
| Triglyceride, mmol/L                      | 0.82 (0.62, 1.15)                      | 1.20 [0.85, 1.75)                    | <0.001         |
| HDL cholesterol, mmol/L                   | 1.63 ± 0.40                            | 1.43 ± 0.38                          | <0.001         |
| LDL cholesterol, mmol/L                   | 2.92 ± 0.78                            | 3.30 ± 0.87                          | <0.001         |
| Glucose, mmol/L                           | 5.05 ± 0.56                            | 5.56 ± 1.16                          | <0.001         |
| hsCRP, mg/L                               | 0.4 (0.2, 0.7)                         | 0.6 (0.3, 1.3)                       | <0.001         |
| Vigorous exercise, <i>n</i> (%)           |                                        |                                      | <0.001         |
| none/week                                 | 65,852/99,279 (66.3)                   | 3300/5647 (58.4)                     |                |
| < 3 times/week                            | 22,168/99,279 (22.3)                   | 1508/5647 (26.7)                     |                |
| ≥ 3 times/week                            | 11,269/99,279 (11.3)                   | 839/5647 (14.9)                      |                |
| Daily alcohol consumption, gram           | 4.0 (1.0, 10.0)                        | 5.0 (1.0, 14.3)                      | <0.001         |
| Alcohol consumption, <i>n</i> (%)         |                                        |                                      | <0.001         |
| none/week                                 | 14,795/96,481 (15.3)                   | 887/5,442 (16.3)                     |                |
| 1–2 times/week                            | 74,428/96,481 (77.1)                   | 3898/5442 (71.6)                     |                |
| 3–4 times/week                            | 6248/96,481 (6.5)                      | 567/5442 (10.4)                      |                |
| ≥5 times/week                             | 1010/96,481 (1.0)                      | 90/5442 (1.7)                        |                |
| Daily times of SHS exposure, <i>n</i> (%) |                                        |                                      | <0.001         |
| None                                      | 78,881/91,488 (86.2)                   | 4222/5128 (82.3)                     |                |
| <1 hour/day                               | 8629/91,488 (9.4)                      | 582/5128 (11.3)                      |                |
| ≥1 hour/day                               | 3978/91,488 (4.3)                      | 324/5128 (6.3)                       |                |
| Frequency of SHS exposure, <i>n</i> (%)   |                                        |                                      | <0.001         |
| None                                      | 78,819/100,017 (78.8)                  | 4213/5720 (73.7)                     |                |
| <3 times/week                             | 13,947/100,017 (13.9)                  | 944/5720 (16.5)                      |                |
| ≥3 times/week                             | 7251/100,017 (7.2)                     | 563/5720 (9.8)                       |                |
| Duration of SHS exposure, <i>n</i> (%)    |                                        |                                      | <0.001         |
| None                                      | 78,596/93,291 (84.2)                   | 4190/5243 (79.9)                     |                |

|                                              |                       |                  |        |
|----------------------------------------------|-----------------------|------------------|--------|
| < 10 years                                   | 6044/93,291 (6.5)     | 365/5243 (7.0)   |        |
| ≥ 10 years                                   | 8651/93,291 (9.3)     | 688/5243 (13.1)  |        |
| Home SHS before age 20, <i>n</i> (%)         | 48,626/100,322 (48.5) | 2910/5755 (50.6) | 0.002  |
| Home SHS after age 20, <i>n</i> (%)          | 27,987/99,694 (28.1)  | 1706/5723 (29.8) | 0.005  |
| SHS exposure, <i>n</i> (%)                   | 21,441/100,322 (21.4) | 1533/5755 (26.6) | <0.001 |
| Ani-hypertensive medication(s), <i>n</i> (%) | 0/100,322 (0)         | 2060/5755 (35.8) | <0.001 |

Data are shown as mean ± standard deviation, median (interquartile) or percentage. Triglyceride, hsCRP, and daily alcohol amount were log-transformed for this analysis. *p* values were based on Student's *t*-test or Chi-square test. Secondhand smoke exposure was defined as current exposure to passive smoking indoors at home or the workplace. SHS, secondhand smoke; *n*, number; HDL, high-density lipoprotein; LDL, low-density lipoprotein; hsCRP, high-sensitivity C-reactive protein.

**Table S2.** Multivariate logistic regression analyses for the association of hypertension using 2017 ACC/AHA high blood pressure clinical practice guideline <sup>a</sup> with secondhand smoke exposure in never-smokers.

|                               |                                    | Odds ratios (95% Confidence interval) |                   |
|-------------------------------|------------------------------------|---------------------------------------|-------------------|
|                               | Cases of hypertension <sup>b</sup> | Age-adjusted                          | Multivariate      |
| Overall <sup>c</sup>          |                                    |                                       |                   |
| SHS exposure (-)              | 9,083/83,103 (10.9)                | 1                                     | 1                 |
| SHS exposure (+) <sup>d</sup> | 3153/22,974 (13.7)                 | 1.17 (1.11, 1.22)                     | 1.09 (1.03, 1.14) |
| Males                         |                                    |                                       |                   |
| SHS exposure (-)              | 5,518/24,019 (23.0)                | 1                                     | 1                 |
| SHS exposure (+) <sup>d</sup> | 2118/8,532 (24.8)                  | 1.13 (1.06, 1.20)                     | 1.06 (1.00, 1.13) |
| Females                       |                                    |                                       |                   |
| SHS exposure (-)              | 3,565/59,084 (6.0)                 | 1                                     | 1                 |
| SHS exposure (+) <sup>d</sup> | 1035/14,442 (7.2)                  | 1.21 (1.12, 1.31)                     | 1.12 (1.02, 1.21) |

<sup>a</sup> Hypertension was defined as systolic/diastolic blood pressure ≥ 130/80 mmHg using 2017 ACC/AHA high blood pressure clinical practice guideline [18]. <sup>b</sup> Values are expressed as *n*/*N* (%), where *n* is number of cases with a given variable and *N* is total number considered for that variable.

<sup>c</sup> Models adjusted for sex in overall population. <sup>d</sup> Reference group is group without SHS exposure. Multivariate model was adjusted for age, waist circumference, body mass index, frequency of alcohol drinking, frequency of vigorous exercise, glucose, creatinine, uric acid, total cholesterol, high-density lipoprotein cholesterol, low-density lipoprotein cholesterol, triglyceride, and high-sensitivity C-reactive protein. SHS, secondhand smoke.
